# Supplementary material for: Pre- and Post-Race Intestinal Microbiota in Long-Distance Sled Dogs and Associations with Performance
Source: PubMed Central journal article supplement (PMC7071093; doi:10.3390/ani10020204), 2020-01-25
Supplement: animals-10-00204-s001.pdf [file animals-10-00204-s001.pdf]

**SUPPLEMENTARY INFORMATION**

**Suppl. Table 1. Association between dysbiosis and data from questionnaire**

| Kennel# | No. of dogs in the race | Median Dysbiosis | Final race pos | No. of dogs in kennel | No. of dogs < 1 year <sup>1</sup> | No. of dogs 1-3 year <sup>2</sup> | No. of dogs > 3 year <sup>3</sup> | No. of new dogs last year <sup>4</sup> | Peak exercise (hours) <sup>5</sup> | Dry feed (%) | Dry feed type              | Median age (years) |
|---------|-------------------------|------------------|----------------|-----------------------|-----------------------------------|-----------------------------------|-----------------------------------|----------------------------------------|------------------------------------|--------------|----------------------------|--------------------|
| 1       | 12                      | -8.33            | 34             | 23                    | 0                                 | 8                                 | 15                                | 0                                      | 25                                 | 25           | Sportsman's pride          | 5.50               |
| 2       | 11                      | -8.95            | 46             | 21                    | 1                                 | 8                                 | 12                                | 1                                      | 30                                 | 25           | Royal Canine 5400          | 4.50               |
| 3       | 12                      | -5.86            | 58             | 12                    | 0                                 | 5                                 | 7                                 | 1                                      | 40                                 | 50           | Troll                      | 6.50               |
| 4       | 11                      | -6.67            | RD             | 29                    | 0                                 | 18                                | 11                                | 1                                      | 80                                 | 50           | Troll, extreme             | 3.50               |
| 5       | 11                      | -7.56            | 42             | 19                    | 0                                 | 8                                 | 11                                | 2                                      | 36                                 | 25           | Labb                       | 5.00               |
| 6       | 12                      | -9.22            | 24             | 15                    | 5                                 | 6                                 | 4                                 | 0                                      | 24                                 | 25           | Eukanuba performance       | 3.75               |
| 7       | 8                       | -4.67            | 63             | 11                    | 0                                 | 3                                 | 8                                 | 2                                      | 60                                 | 25           | Eukanuba performance       | 6.00               |
| 9       | 12                      | -8.03            | 24             | 10                    | 0                                 | 2                                 | 8                                 | 0                                      | 30                                 | 50           | Various                    | 6.00               |
| 10      | 12                      | -7.07            | RD             | 15                    | 3                                 | 3                                 | 9                                 | 0                                      | 35                                 | 50           | Troll                      | 3.50               |
| 11      | 12                      | -6.89            | 8              | 12                    | 0                                 | 9                                 | 3                                 | 6                                      | 48                                 | 25           | Eukanuba working endurance | 2.00               |
| 13      | 10                      | -8.13            | 22             | 12                    | 0                                 | 7                                 | 5                                 | 8                                      | 36                                 | 25           | Labb extreme               | 2.00               |
| 16      | 11                      | -5.89            | 65             | 9                     | 0                                 | 3                                 | 6                                 | 3                                      | 35                                 | 50           | Troll                      | 2.00               |
| 18      | 10                      | -9.22            | 3              | 15                    | 5                                 | 2                                 | 8                                 | 6                                      | 48                                 | 50           | Appetitt extreme           | 3.00               |

20                      12                      -6.05                      30                      22                      6                      4                      12                      0                      50                      75                      Sportsman's  
 pride                      4.00

<sup>1-3</sup> Number of dogs in in kennel based on defined age groups, <sup>4</sup> Number of new dogs introduced in kennel last year (2015) and <sup>5</sup> Number of hours at peak exercise before race. Teams that withdrew during the race are marked with RD.

**Suppl. Table 2. Fecal *Giardia* load and fecal score from each attending dog two weeks before and two weeks after the race.**

| Kennel # | Dog   |          |        |       | <i>Giardia</i> IMS/IFAT <sup>1</sup> |           | Ave fecal score <sup>2</sup> |           |
|----------|-------|----------|--------|-------|--------------------------------------|-----------|------------------------------|-----------|
|          | ID    | Age (yr) | Gender | Breed | Pre-race                             | Post-race | Pre-race                     | Post-race |
|          |       |          |        |       |                                      |           |                              |           |
| 1        | FL1.1 | 7        | M      | AH    | 0                                    | 1         | 4                            | 4         |
|          | FL1.2 | 9        | M      | AH    | 0                                    | 1         | 3                            | 3         |
|          | FL1.3 | 4        | M      | AH    | 1                                    | 0         | 2                            | 3         |
|          | FL1.4 | 5        | M      | AH    | 0                                    | 0         | 4                            | 4         |
|          | FL1.5 | 2        | M      | AH    | 0                                    | 1         | 3                            | 3         |
|          | FL1.6 | 7        | M      | AH    | 0                                    | 0         | 2                            | 3         |
| 2        | FL2.1 | 4        | M      | SH    | 1                                    | 1         | 2                            | 3         |
|          | FL2.2 | 7        | M      | SH    | 0                                    | 0         | 3                            | 3         |
|          | FL2.4 | 4        | M      | SH    | 1                                    | 0         | 3                            | 4         |
|          | FL2.5 | 3        | F      | SH    | 0                                    | 0         | 2                            | 2         |
|          | FL2.6 | 6        | M      | SH    | 1                                    | 0         | 4                            | 2         |
| 3        | FL3.1 | 10       | M      | AH    | 1                                    | 0         | 4                            | 3         |
|          | FL3.2 | 10       | M      | AH    | 0                                    | 0         | 2                            | 2         |
|          | FL3.3 | 5        | F      | AH    | 0                                    | 0         | 2                            | 2         |
|          | FL3.4 | 5        | F      | AH    | 1                                    | 0         | 3                            | 3         |
|          | FL3.5 | 5        | F      | AH    | 1                                    | 1         | 3                            | 2         |
|          | FL3.6 | 8        | F      | AH    | 0                                    | 0         | 3                            | 3         |

|   |       |   |   |    |   |   |   |   |
|---|-------|---|---|----|---|---|---|---|
| 4 | FL4.1 | 3 | M | AH | 0 | 1 | 3 | 3 |
|   | FL4.2 | 3 | F | AH | 0 | 1 | 3 | 3 |
|   | FL4.3 | 3 | M | AH | 0 | 0 | 3 | 3 |
|   | FL4.4 | 8 | F | AH | 1 | 0 | 2 | 3 |
|   | FL4.5 | 6 | M | AH | 0 | 1 | 2 | 3 |
|   | FL4.6 | 4 | M | AH | 0 | 0 | 3 | 3 |
| 5 | FL5.1 | 8 | M | AH | 0 | 0 | 3 | 2 |
|   | FL5.2 | 6 | M | AH | 1 | 0 | 2 | 2 |
|   | FL5.3 | 4 | M | AH | 0 | 1 | 3 | 3 |
|   | FL5.4 | 7 | M | AH | 0 | 1 | 3 | 3 |
|   | FL5.5 | 3 | F | AH | 1 | 0 | 3 | 3 |
|   | FL5.6 | 4 | F | AH | 0 | 1 | 2 | 3 |
| 6 | FL6.1 | 3 | F | AH | 1 | 1 | 4 | 3 |
|   | FL6.2 | 3 | M | AH | 0 | 1 | 4 | 2 |
|   | FL6.3 | 5 | F | AH | 0 | 1 | 3 | 4 |
|   | FL6.4 | 7 | M | AH | 1 | 0 | 4 | 3 |
|   | FL6.5 | 7 | M | AH | 0 | 1 | 3 | 3 |
|   | FL6.6 | 3 | F | AH | 0 | 0 | 4 | 3 |
| 7 | FL7.1 | 7 | M | AH | 0 | 0 | 3 | 3 |
|   | FL7.2 | 7 | F | AH | 0 | 0 | 2 | 3 |
|   | FL7.3 | 5 | M | AH | 1 | 0 | 4 | 2 |
|   | FL7.4 | 7 | M | AH | 1 | 0 | 3 | 2 |
|   | FL7.5 | 2 | F | AH | 1 | 0 | 2 | 2 |
|   | FL7.6 | 2 | F | AH | 0 | 1 | 4 | 3 |
| 9 | FL9.1 | 5 | F | AH | 1 | 1 | 3 | 3 |
|   | FL9.2 | 5 | F | AH | 1 | 1 | 3 | 4 |

|    |        |   |   |    |   |    |   |    |
|----|--------|---|---|----|---|----|---|----|
|    | FL9.3  | 6 | F | AH | 0 | 1  | 3 | 4  |
|    | FL9.4  | 6 | F | AH | 0 | 0  | 3 | 3  |
|    | FL9.5  | 6 | M | AH | 1 | 0  | 3 | 3  |
| 10 | FL10.1 | 3 | M | SH | 1 | 1  | 2 | 3  |
|    | FL10.2 | 4 | M | SH | 0 | 1  | 3 | 4  |
|    | FL10.3 | 5 | M | SH | 1 | 1  | 3 | 3  |
|    | FL10.4 | 7 | M | SH | 1 | 1  | 3 | 3  |
|    | FL10.5 | 3 | F | SH | 1 | 1  | 3 | 4  |
|    | FL10.6 | 3 | F | SH | 1 | ND | 3 | 4  |
| 11 | FL11.1 | 2 | M | AH | 1 | 1  | 4 | 4  |
|    | FL11.2 | 5 | M | AH | 1 | 1  | 3 | 4  |
|    | FL11.3 | 2 | M | AH | 0 | 1  | 4 | 4  |
|    | FL11.4 | 2 | M | AH | 1 | 0  | 4 | 4  |
|    | FL11.5 | 2 | M | AH | 1 | 0  | 4 | 4  |
|    | FL11.6 | 2 | M | AH | 0 | 0  | 3 | 4  |
| 13 | FL13.1 | 2 | M | AH | 0 | ND | 4 | ND |
|    | FL13.2 | 7 | M | AH | 0 | 0  | 4 | 3  |
|    | FL13.3 | 4 | M | AH | 0 | 0  | 4 | 4  |
|    | FL13.4 | 2 | M | AH | 0 | ND | 4 | ND |
|    | FL13.6 | 2 | M | AH | 0 | 0  | 4 | 2  |
| 16 | FL16.1 | 5 | F | AH | 1 | 1  | 4 | 3  |
|    | FL16.3 | 2 | F | AH | 0 | 1  | 3 | 3  |
|    | FL16.4 | 6 | M | AH | 0 | 1  | 3 | 4  |
|    | FL16.5 | 2 | M | AH | 1 | ND | 3 | ND |
|    | FL16.6 | 4 | M | AH | 0 | 1  | 3 | 2  |
| 18 | FL18.1 | 4 | M | AH | 0 | 1  | 3 | 3  |

|    |        |   |   |    |   |   |   |   |
|----|--------|---|---|----|---|---|---|---|
|    | FL18.2 | 2 | M | AH | 1 | 1 | 3 | 3 |
|    | FL18.3 | 3 | M | AH | 0 | 1 | 2 | 2 |
|    | FL18.4 | 3 | M | AH | 0 | 0 | 3 | 3 |
|    | FL18.5 | 3 | M | AH | 0 | 0 | 3 | 3 |
|    | FL20.1 | 5 | M | AH | 0 | 0 | 2 | 3 |
|    | FL20.2 | 6 | M | AH | 0 | 0 | 2 | 4 |
| 20 | FL20.3 | 4 | F | AH | 0 | 0 | 3 | 3 |
|    | FL20.4 | 4 | F | AH | 0 | 1 | 2 | 3 |
|    | FL20.5 | 4 | F | AH | 0 | 0 | 3 | 2 |
|    | FL20.6 | 4 | F | AH | 0 | 0 | 3 | 3 |

<sup>1</sup>0=*Giardia*-negative, 1=*Giardia*-positive, ND=Not determined, M=male, F=female, AH=Alaskan Husky, SH=Siberian Husky

<sup>2</sup>Average of three measurements
